# Supplementary material
Source: Springer Nature journal article supplement (https://www.springermedizin.de/resource/supplementary/12943_2013_1219_MOESM5_ESM.pdf/9552420)

**A**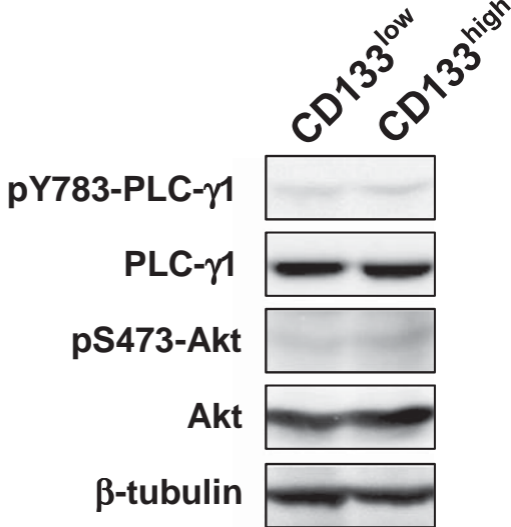**B**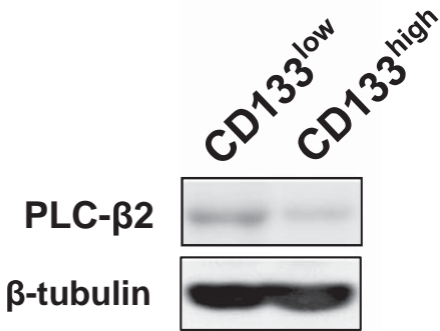

Supplement: MOESM5 [file 9552420]
